# Supplementary material
Source: publisher figshare collection journal article supplement (https://tandf.figshare.com/ndownloader/files/21806889)
Supplement: Supplementary file 1 [file 21806889]

**Appendix**

All of the investigators in the SUPERIOR (Efficacy and safety of different ticagrelor regimens versus clopidogrel in patients with coronary artery disease: a retrospective multicenter study) Study Group contributed to this study. The members of the study group were as follows: **Steering Committee**: Yue Li, Zhiren Zhang, Jing Shi, Meijiao He, Wennan Wang, and Guangzhong Liu. **The following investigators participated in this study**: The First Affiliated Hospital of Harbin Medical University: Yue Li, Weimin Li, Yihui Kong, Hong Guo, Li Sheng, Jingyi Xue, Hongjie Xue, Yongtai Gong, Guangzhong Liu, Jing Shi, Meijiao He, Tiankai Li, Jianqiang Li, Danghui Sun, Wennan Wang, Jia Li, Yanming Sun, Ruiying Zhang, Dan Ma, Wei Pan, Jingjie Li, Wei Feng, Xiaoyu Wu, Tianzhu Luan, Yujuan Zhao, Ling Jing, and Jiyi Zhao; Beijing Anzhen Hospital, Capital Medical University: Zening Jin, Xiantao Song, Ruofei Jia and Nan Nan; The Central Hospital of Jia Mu Si City: Zhiyuan Weng, Guixia Zhang, Dayu Su and Mingliang Zhang; The First Affiliated Hospital of Kunming Medical University: Hao Guo and Xinyue Liang; Renji Hospital, School of Medicine, Shanghai Jiaotong University: Jun Pu, Song Ding, Lingcong Kong and Wei Jin; General Hospital, Tianjin Medical University: Qing Yang, Yongle Li, Bo Bian, Xianming Wu, Xue Wang and Chengcheng Wu; Weifang People’s Hospital: Jingbo Shao and Shuxin Li; Union Hospital, Tongji Medical College, Huazhong University of Science and Technology: Xiang Cheng and Tian Xie; Shengjing Hospital of China Medical University: Wenyue Pang and Jing Qi; Shaanxi Provincial People's Hospital: Huolan Zhu; The First Affiliated Hospital of Dalian Medical University: Yunlong Xia, Bo Zhang, Dongxia Wang and Nan Wang. All the authors report no conﬂicts.
